# Supplementary material
Source: MDPI journal article supplement (https://www.mdpi.com/2076-3417/12/15/7673)
Supplement: s1 [file s1 › applsci-1786161-supplementary.pdf]

## Supplementary Figure S1

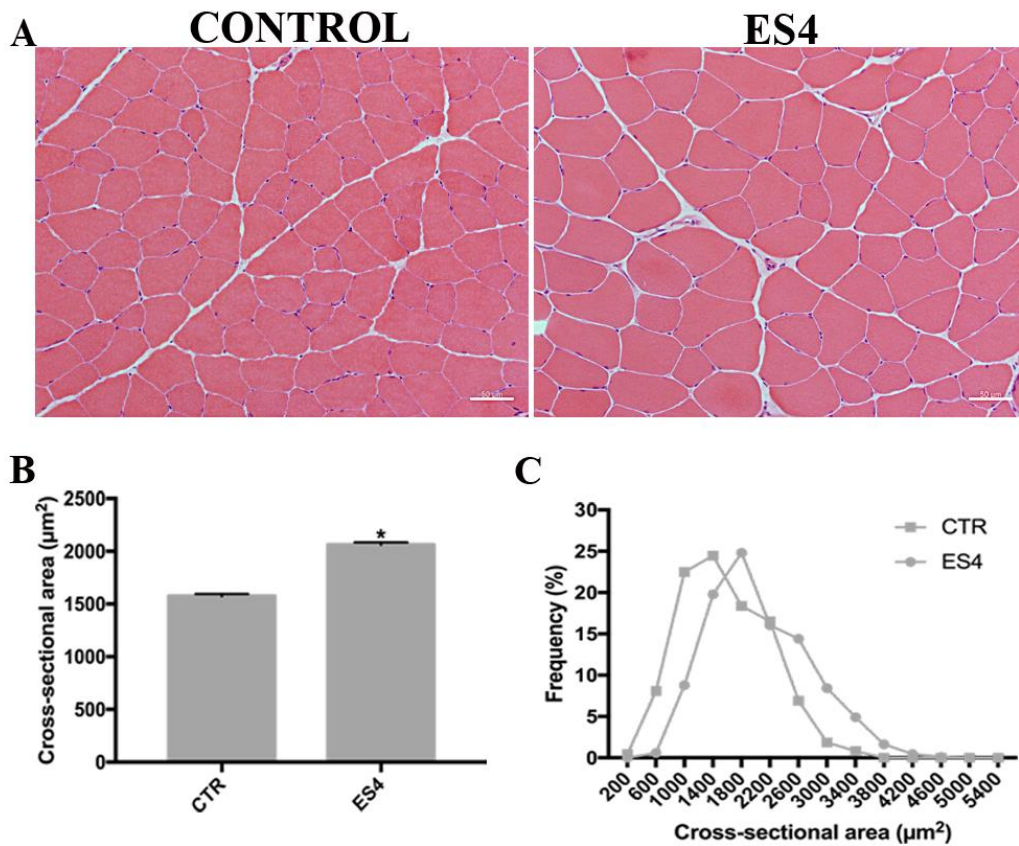

**Supplementary Figure S1.** Morphometric analyses after four weeks of electrical stimulation are depicted. **(A)** Representative hematoxylin–eosin staining (HE) photomicrographs in TA muscle after four weeks of electrical stimulation ( $n = 4$ , scale bar  $50\ \mu\text{m}$ ). **(B)** TA muscle average fiber cross-sectional area (CSA) and **(C)** distribution from control and four weeks of electrical stimulation ( $n = 4$ ). In the statistical analysis, a Mann-Whitney test were employed. \* $p < 0.05$  vs. control group.
